# Supplementary material for: Fibroblast GATA-4 and GATA-6 promote myocardial adaptation to pressure overload by enhancing cardiac angiogenesis
Source: PubMed Central journal article supplement (PMC8055639; doi:10.1007/s00395-021-00862-y), 2021-04-19
Supplement: 395_2021_862_MOESM5_ESM.pdf [file 395_2021_862_MOESM5_ESM.pdf]

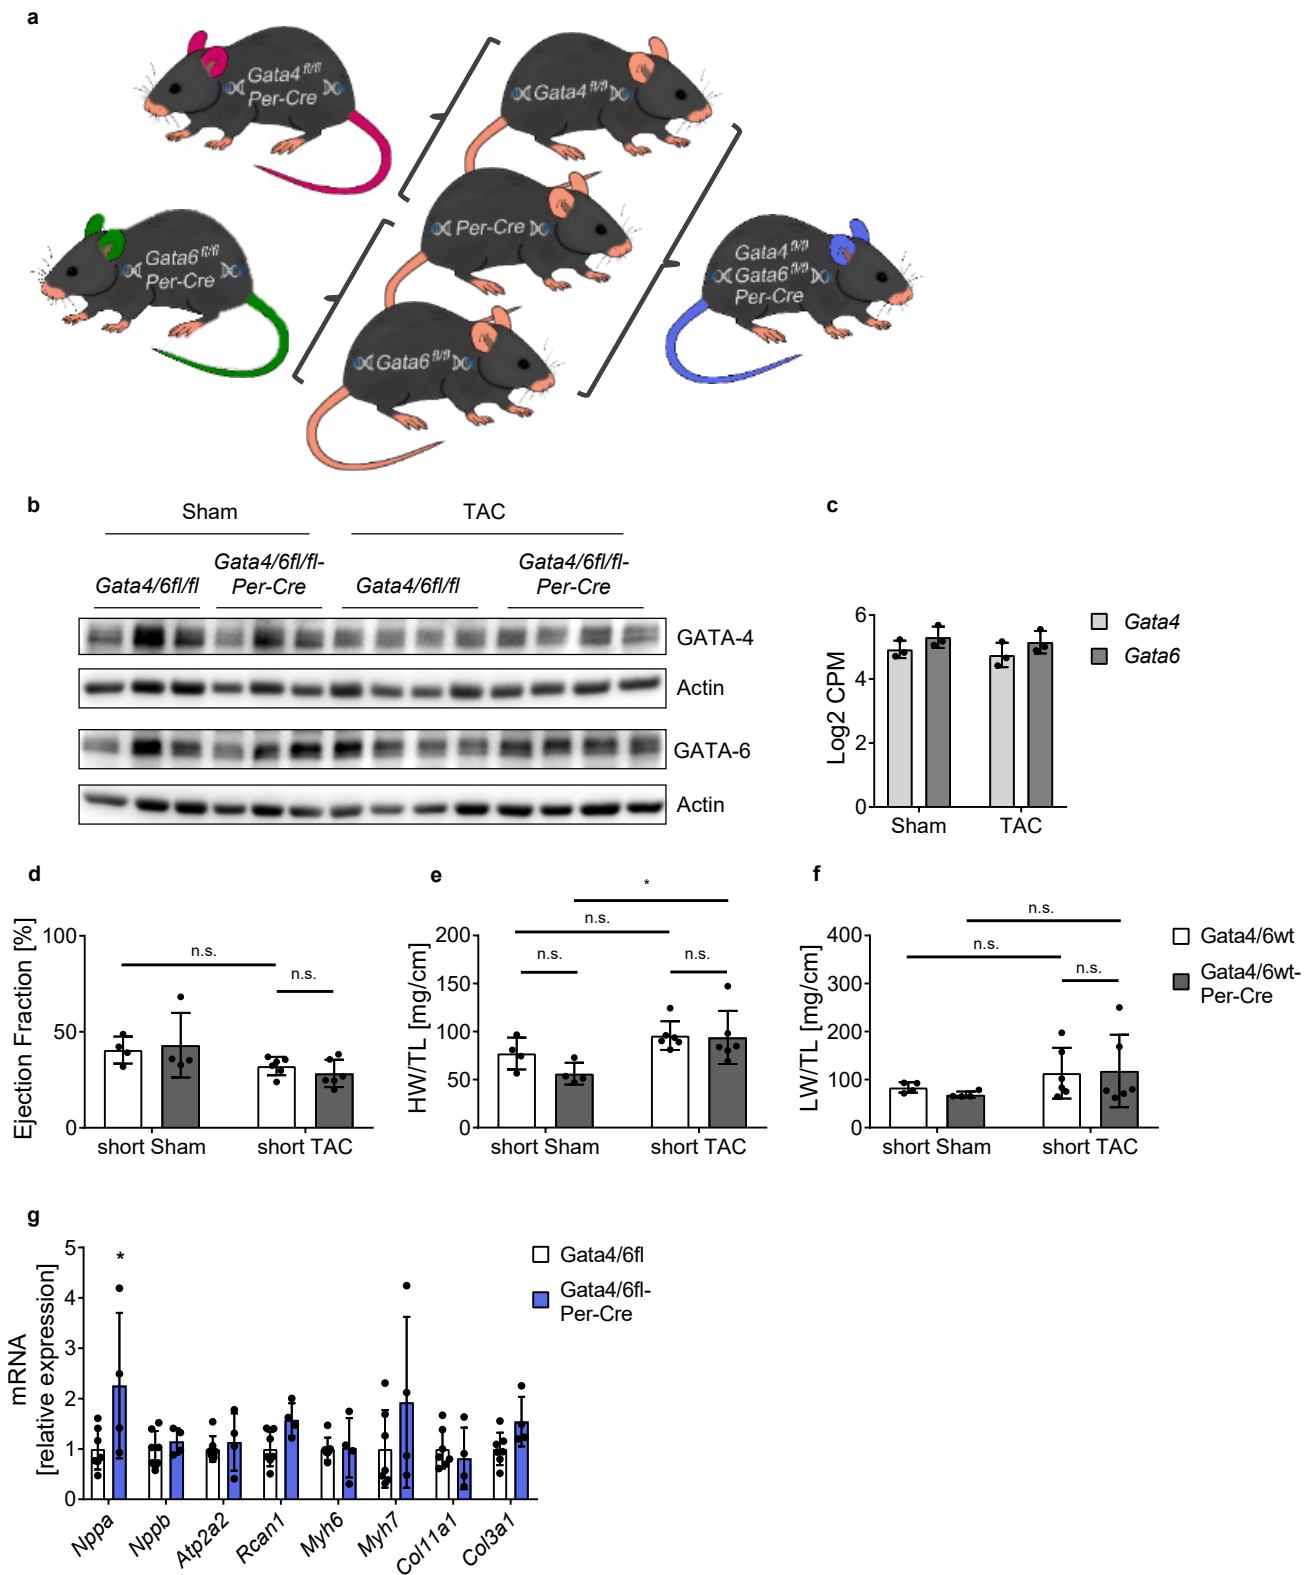

**Suppl. Fig. 1** **a** Schematic illustration showing the interbreeding of *Gata4<sup>fl/fl</sup>* and *Gata6<sup>fl/fl</sup>* with *Tg(Postn-Cre)* (short: *Per-Cre*) mice to obtain mice with specific deletion of *Gata4* (pink), *Gata6* (green) and *Gata4/6* (blue) in activated cardiac fibroblasts. **b** Total GATA-4 and GATA-6 protein level in whole heart tissue from *Gata4/6-Per-Cre* and control mice. **c** Quantification of *Gata4* and *Gata6* RNA expression levels in isolated cardiac fibroblasts from RNA-sequencing (displayed as counts per million reads (CPM)) shows no significant change after pressure overload compared to sham. **d-f** Quantification of the ejection fraction (**d**), HW/TL (**e**) and LW/TL ratio (**f**) in *Gata4/6wt-Per-Cre* and *Gata4/6wt* littermate control mice shows no significant differences in both groups after short-term pressure overload. **g** Relative mRNA expression levels of embryonic cardiac genes and collagen genes in *Gata4/6fl-Per-Cre* and control mice after long-term pressure overload. RNA level are normalized to *Gapdh*. Data are shown as mean  $\pm$  SD. 2-way ANOVA with Sidak's multiple comparisons test (c-f) or student's t-test (g) was used to test for statistical significance. n.s. indicates no statistical significance between groups, \* $p < 0.05$ .

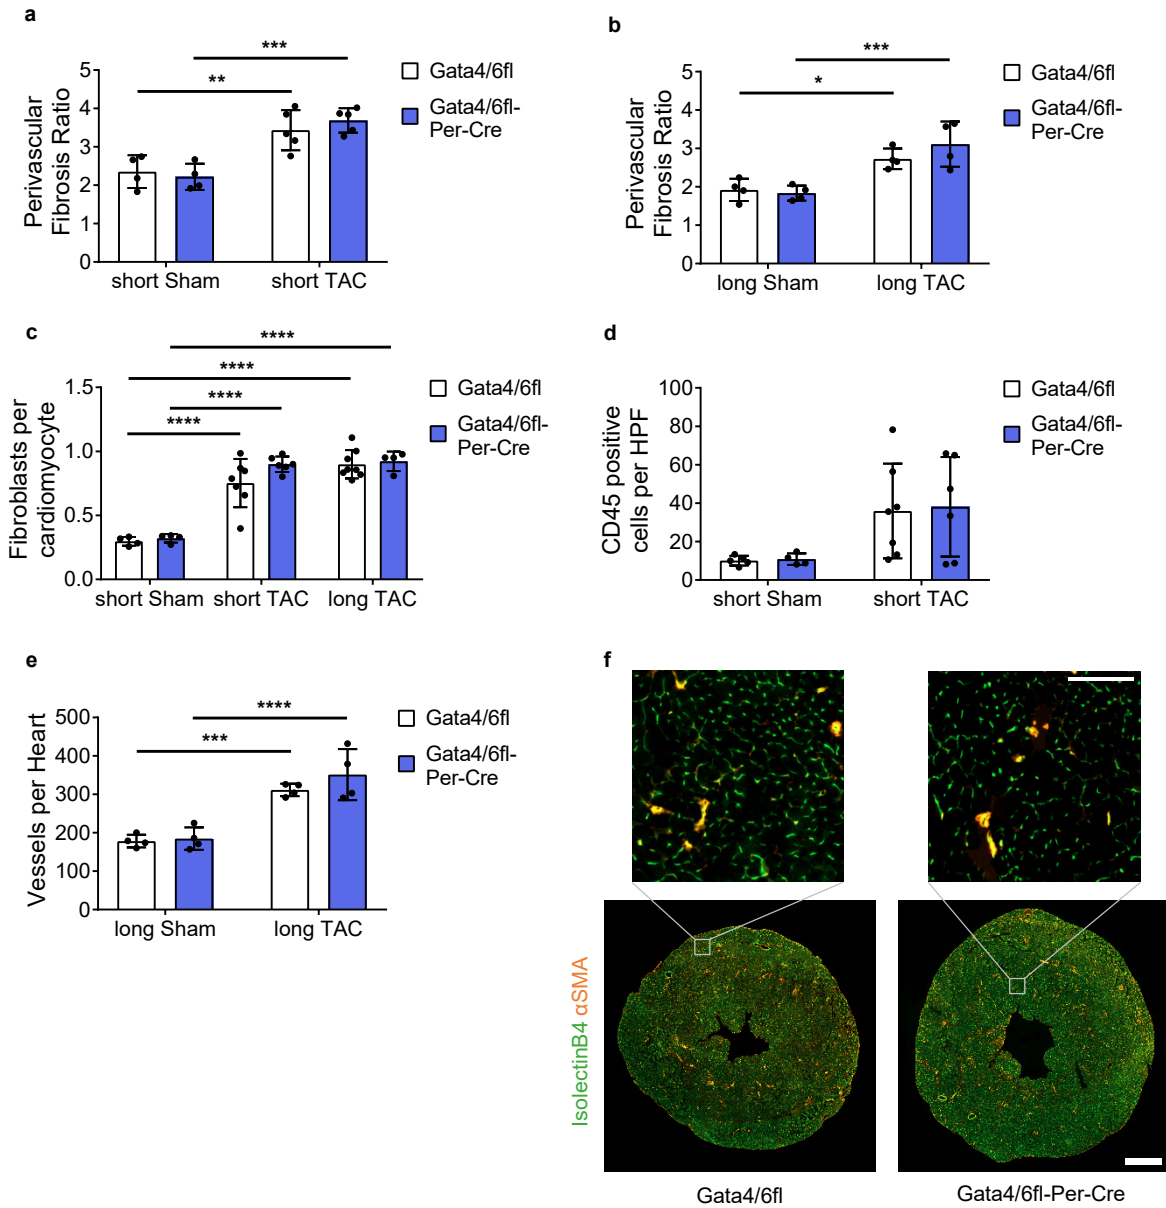

**Suppl. Fig. 2** **a, b** Perivascular fibrosis ratio in heart sections of *Gata4/6fl-Per-Cre* and control mice after short-term (**a**) and long-term (**b**) pressure overload. **c** Number of cardiac fibroblasts per cardiomyocyte in heart sections of *Gata4/6fl-Per-Cre* and control mice quantified from immunofluorescence staining with WGA, PDGFR $\alpha$  and DAPI. **d** Number of CD45 positive cells per high-power field (HPF) in heart sections of *Gata4/6fl-Per-Cre* and control mice. At least 3 images were quantified per heart. **e, f** Number of smooth muscle alpha-actin ( $\alpha$ SMA) positive vessels per heart cross section (**e**) and representative images of  $\alpha$ SMA/IB4 staining after long TAC (**f**), scale bar 1 mm for whole heart images and 100  $\mu$ m for zoomed areas. Data are shown as mean  $\pm$  SD. 2-way ANOVA with Sidak's multiple comparisons test was used to test for statistical significance. \* $p < 0.05$ , \*\* $p < 0.01$ , \*\*\* $p < 0.001$ , \*\*\*\* $p < 0.0001$ .

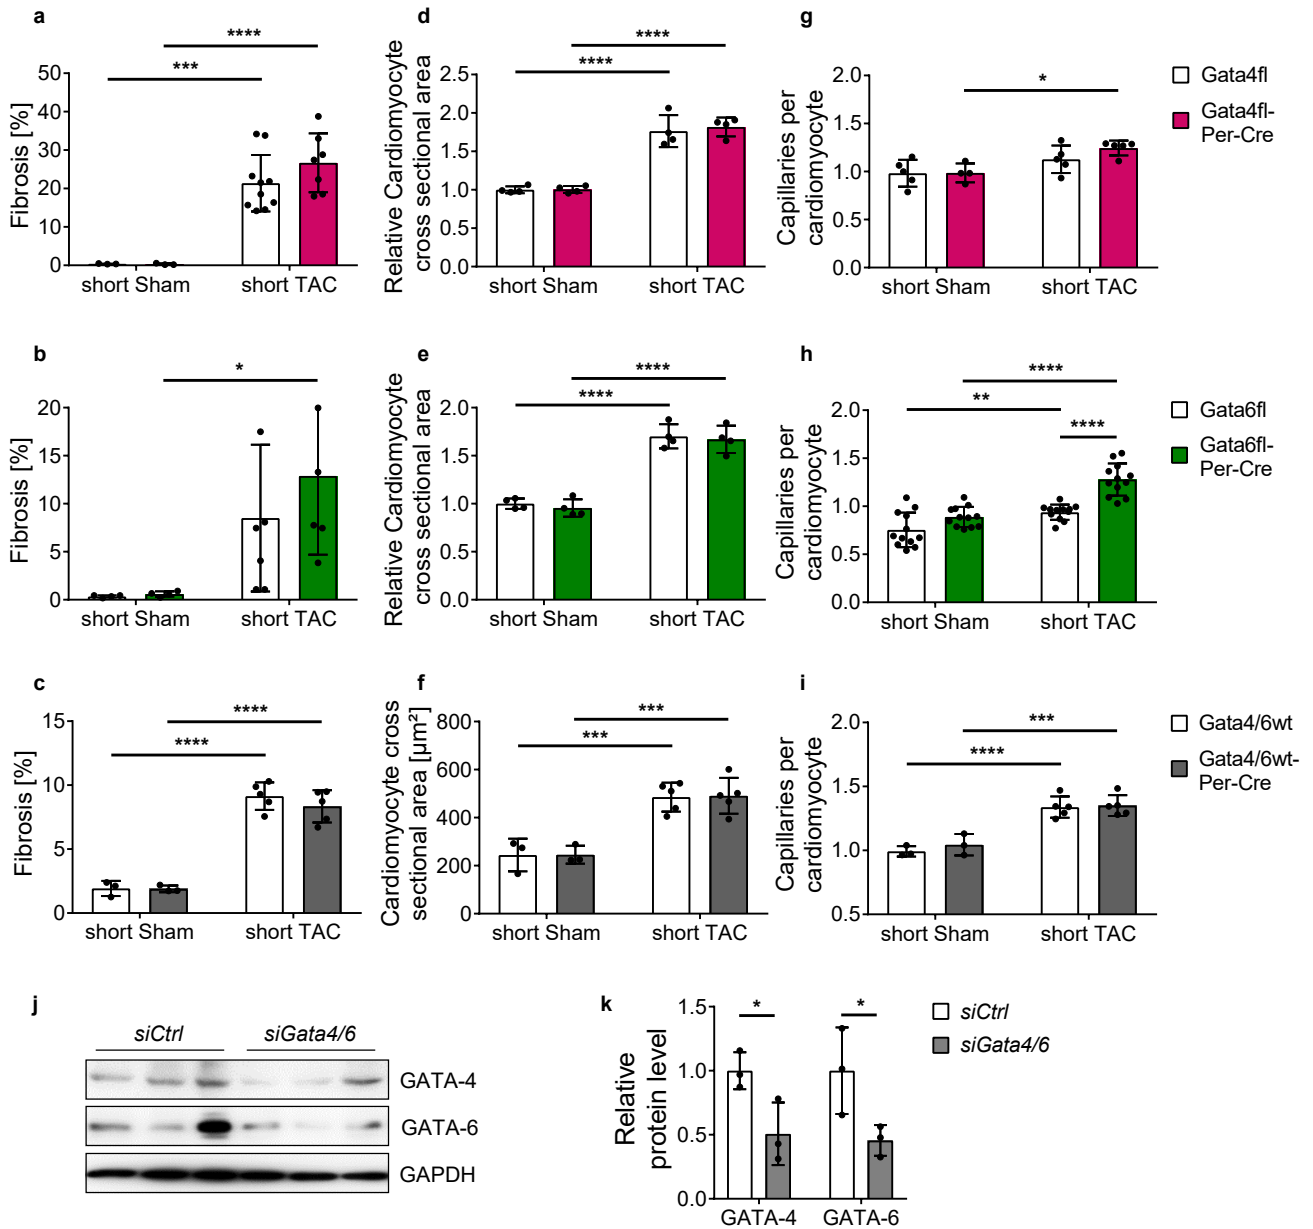

**Suppl. Fig. 3 a-c** Quantification of cardiac fibrosis from transverse mouse heart sections stained with Sirius red after short term pressure overload or sham in *Gata4fl-Per-Cre* (a), *Gata6fl-Per-Cre* (b) and *Gata4/6wt-Per-Cre* (c) mice. **d-f** Quantification of the cardiomyocyte cross sectional area after short term pressure overload or sham in *Gata4fl-Per-Cre* (d), *Gata6fl-Per-Cre* (e) and *Gata4/6wt-Per-Cre* mice (f). **g-i** Quantification of the capillary density displayed as capillary per cardiomyocyte ratio after short term pressure overload or sham in *Gata4fl-Per-Cre* (g), *Gata6fl-Per-Cre* (h) and *Gata4/6wt-Per-Cre* (i) mice. **j, k** GATA-4 and GATA-6 protein levels in rat cardiac fibroblasts after siRNA mediated downregulation (j) and quantification (k) showing efficient deletion of GATA-4 and GATA-6. Protein levels were normalized to GAPDH for quantification. Data are shown as mean  $\pm$  SD. 2-way ANOVA with Sidak's multiple comparisons test (a-i) or student's t-test (k) was used to test for statistical significance. \* $p < 0.05$ , \*\* $p < 0.01$ , \*\*\* $p < 0.001$ , \*\*\*\* $p < 0.0001$ .

**a**

GO Analysis - BP Cluster Top 20 Upregulated

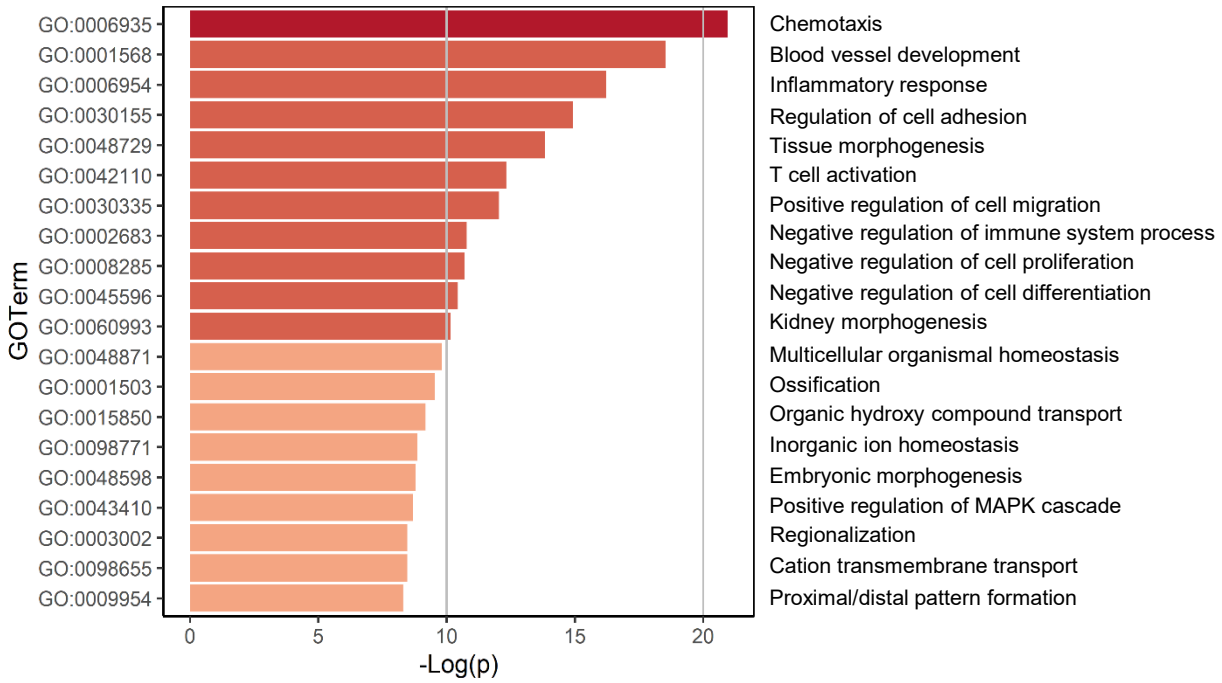

**b**

GO Analysis - BP Cluster Top 20 Downregulated

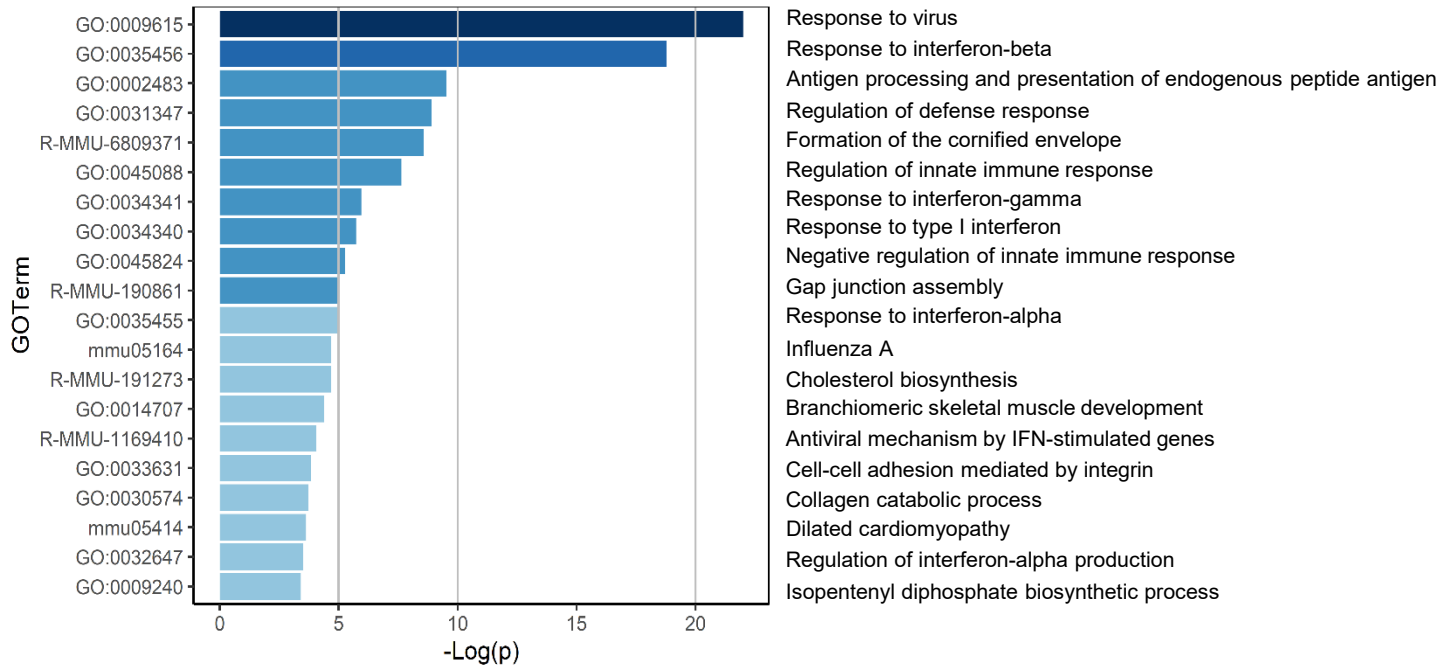

**Suppl. Fig. 4** TOP 20 gene ontology cluster showing the highest enriched genes upon *Gata4/6* deletion in cardiac fibroblasts. **a** GO BP cluster of upregulated genes upon *Gata4/6* deletion. **b** GO BP cluster of downregulated genes upon *Gata4/6* deletion. Analysis was performed with metascape.
